# Supplementary material for: Two water-bridged cobalt(ii) chains with isomeric naphthoate spacers: from metamagnetic to single-chain magnetic behaviour
Source: Royal Society of Chemistry journal article supplement (doi:10.1039/c5dt03297k), 2015-01-01
Supplement: c5dt03297k1.pdf [file c5dt03297k1.pdf]

## Supporting information

### Two water-bridged cobalt(II) chains with isomeric naphthoate spacers: from metamagnetic to single-chain magnetic behaviour

Zhong-Yi Liu,<sup>a</sup> Yan-Fei Xia,<sup>a</sup> En-Cui Yang,<sup>a,\*</sup> and Xiao-Jun Zhao<sup>a,b\*</sup>

<sup>a</sup> College of Chemistry, Key Laboratory of Inorganic-Organic Hybrid Functional Material Chemistry, Ministry of Education, Tianjin Key Laboratory of Structure and Performance for Functional Molecules, Tianjin Normal University, Tianjin 300387, P. R. China

<sup>b</sup> Synergetic Innovation Center of Chemical Science and Engineering (Tianjin), Tianjin 300071, China

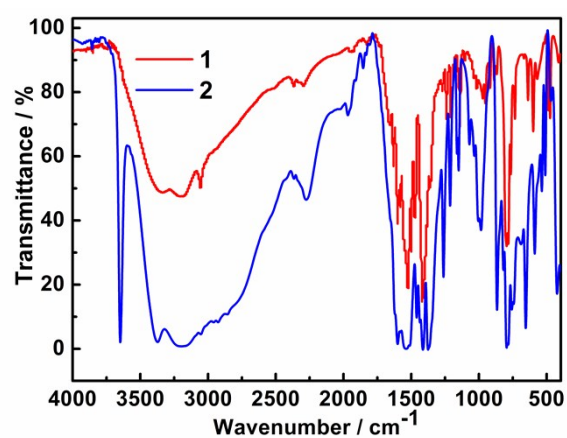

Fig. S1 FT-IR spectra of **1** and **2**.

**Table S1** Hydrogen-bonding parameters (Å, °) for **2**<sup>a</sup>

| D–H···A                   | <i>d</i> (D–H) | <i>d</i> (H···A) | <i>d</i> (D···A) | ∠(D–H···A) |
|---------------------------|----------------|------------------|------------------|------------|
| O5–H5A···O4               | 0.850          | 1.802            | 2.637            | 166.95     |
| O5–H5B···O1 <sup>#1</sup> | 0.850          | 1.799            | 2.635            | 167.71     |
| O6–H6B···O2 <sup>#1</sup> | 0.850          | 1.847            | 2.696            | 176.60     |
| O7–H7B···O3 <sup>#1</sup> | 0.850          | 1.849            | 2.697            | 175.57     |
| O8–H8B···O4               | 0.850          | 1.898            | 2.707            | 158.56     |
| O7–H7A···O8 <sup>#1</sup> | 0.850          | 1.865            | 2.707            | 170.65     |
| O9–H9A···O1               | 0.850          | 1.880            | 2.694            | 159.92     |
| O6–H6A···O9 <sup>#1</sup> | 0.850          | 1.857            | 2.704            | 173.83     |

<sup>a</sup> Symmetry codes: <sup>#1</sup> 3/2 – *x*, *y* – 1/2, 1/2 – *z*.

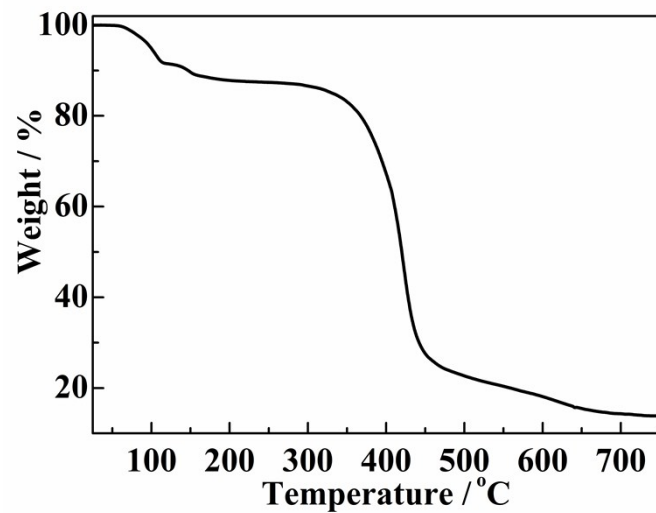

Fig. S2 TGA of 1.

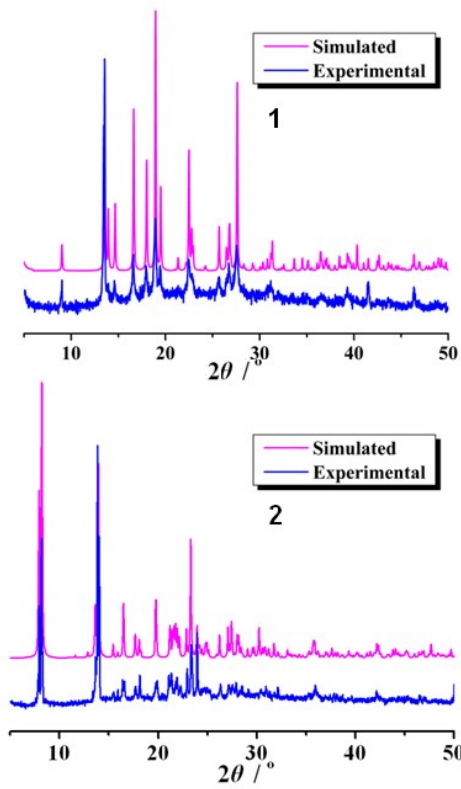

**Fig. S3** Simulated (purple) and experimental (blue) PXRD patterns for **1** and **2**.

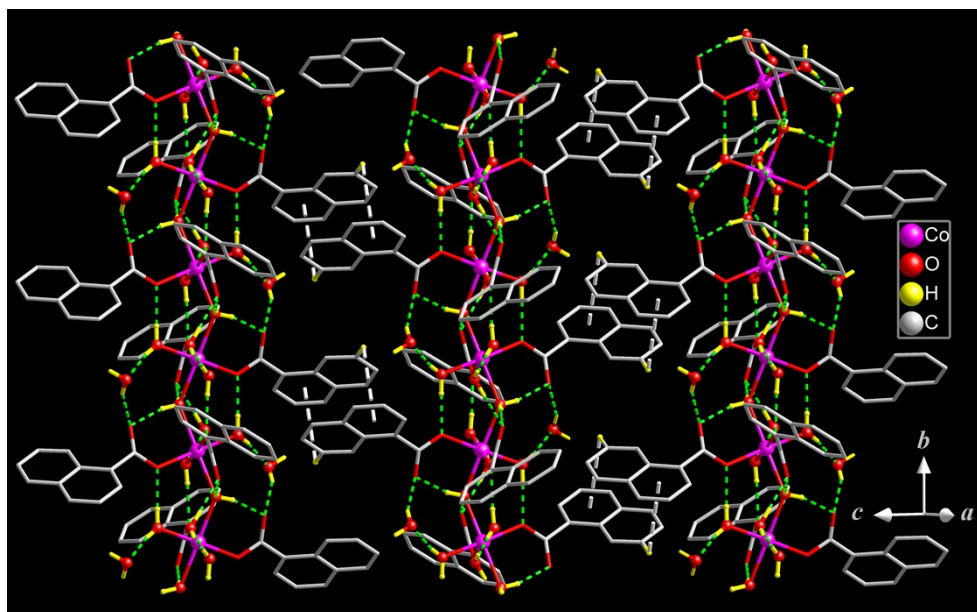

**Fig. S4** 2D network of **2** generated by hydrogen-bonding (green broken lines) and C–H $\cdots\pi$  interactions (white broken lines).

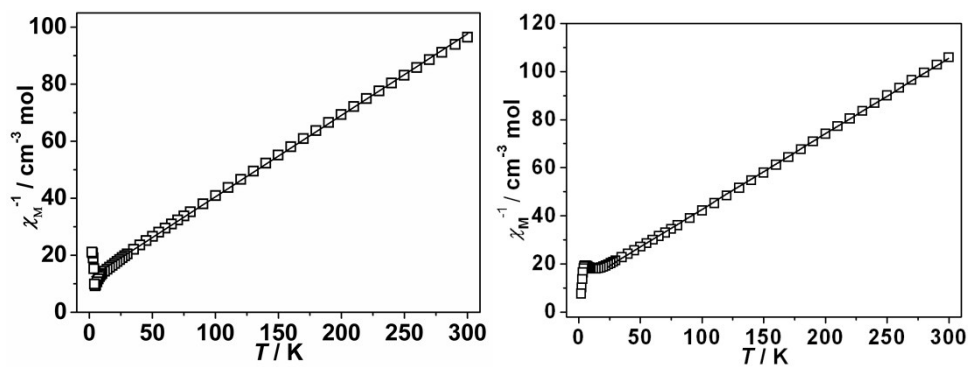

**Fig. S5** Temperature dependence of  $\chi_M^{-1}$  for **1** and **2** (Solid lines correspond to the Curie-Weiss fit).

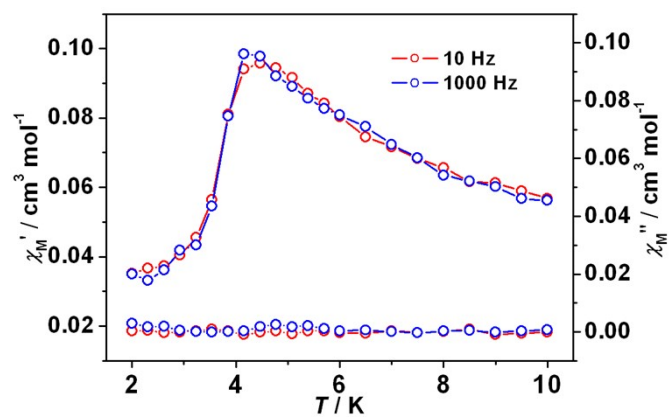

**Fig. S6** Temperature dependence of ac susceptibilities for **1** at different frequencies (10 and 1000 Hz) under  $H_{\text{ac}} = 3.5$  Oe and  $H_{\text{dc}} = 0$  Oe.

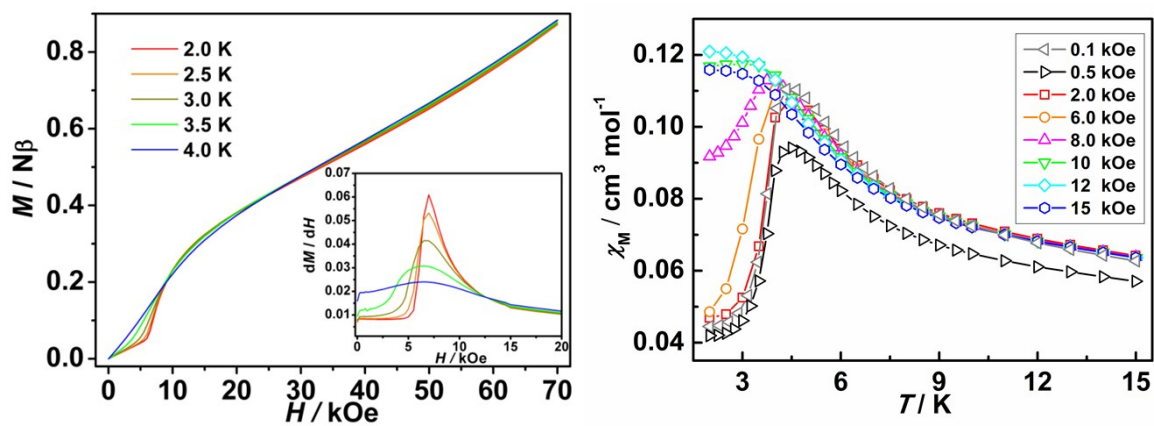

**Fig. S7** (a) Field-dependent magnetizations measured at different temperatures for **1** (insert:  $dM/dH$  curves).  
 (b) Temperature-dependent molar susceptibility for **1** collected at different fields.



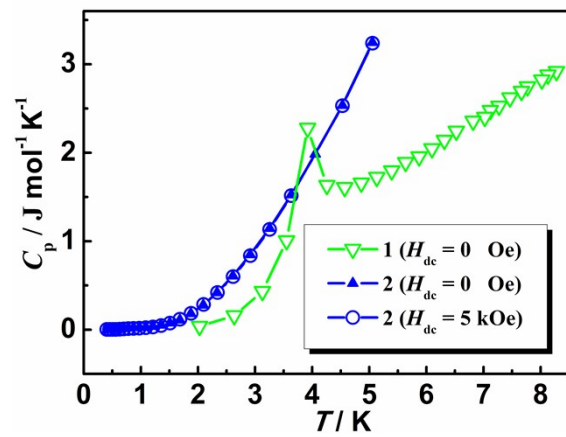

**Fig. S8** Temperature-dependent heat capacity for **1** and **2** measured at different dc fields.

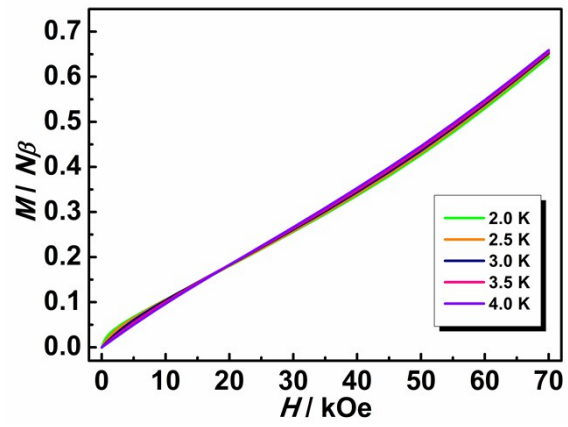

**Fig. S9** Field-dependent magnetizations of **2** measured at different temperatures.

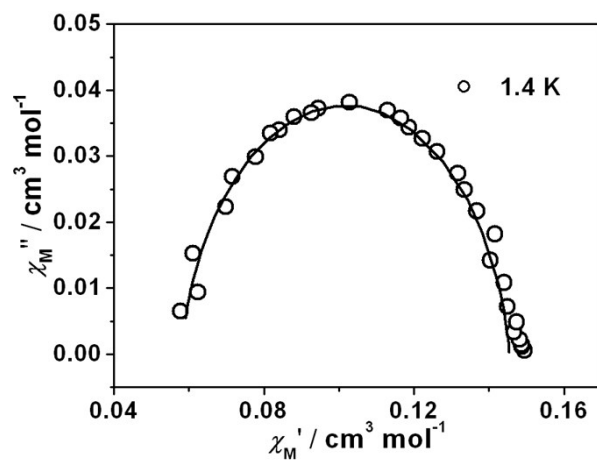

**Fig. S10** Cole–Cole diagram of **2** at 1.4 K (The solid line represents the least-squares fit obtained with a Debye model).
